# Supplementary material for: Exploring STR sequencing for forensic DNA intelligence databasing using the Austrian National DNA Database as an example
Source: Springer Nature journal article supplement (doi:10.1007/s00414-021-02685-x), 2021-08-26

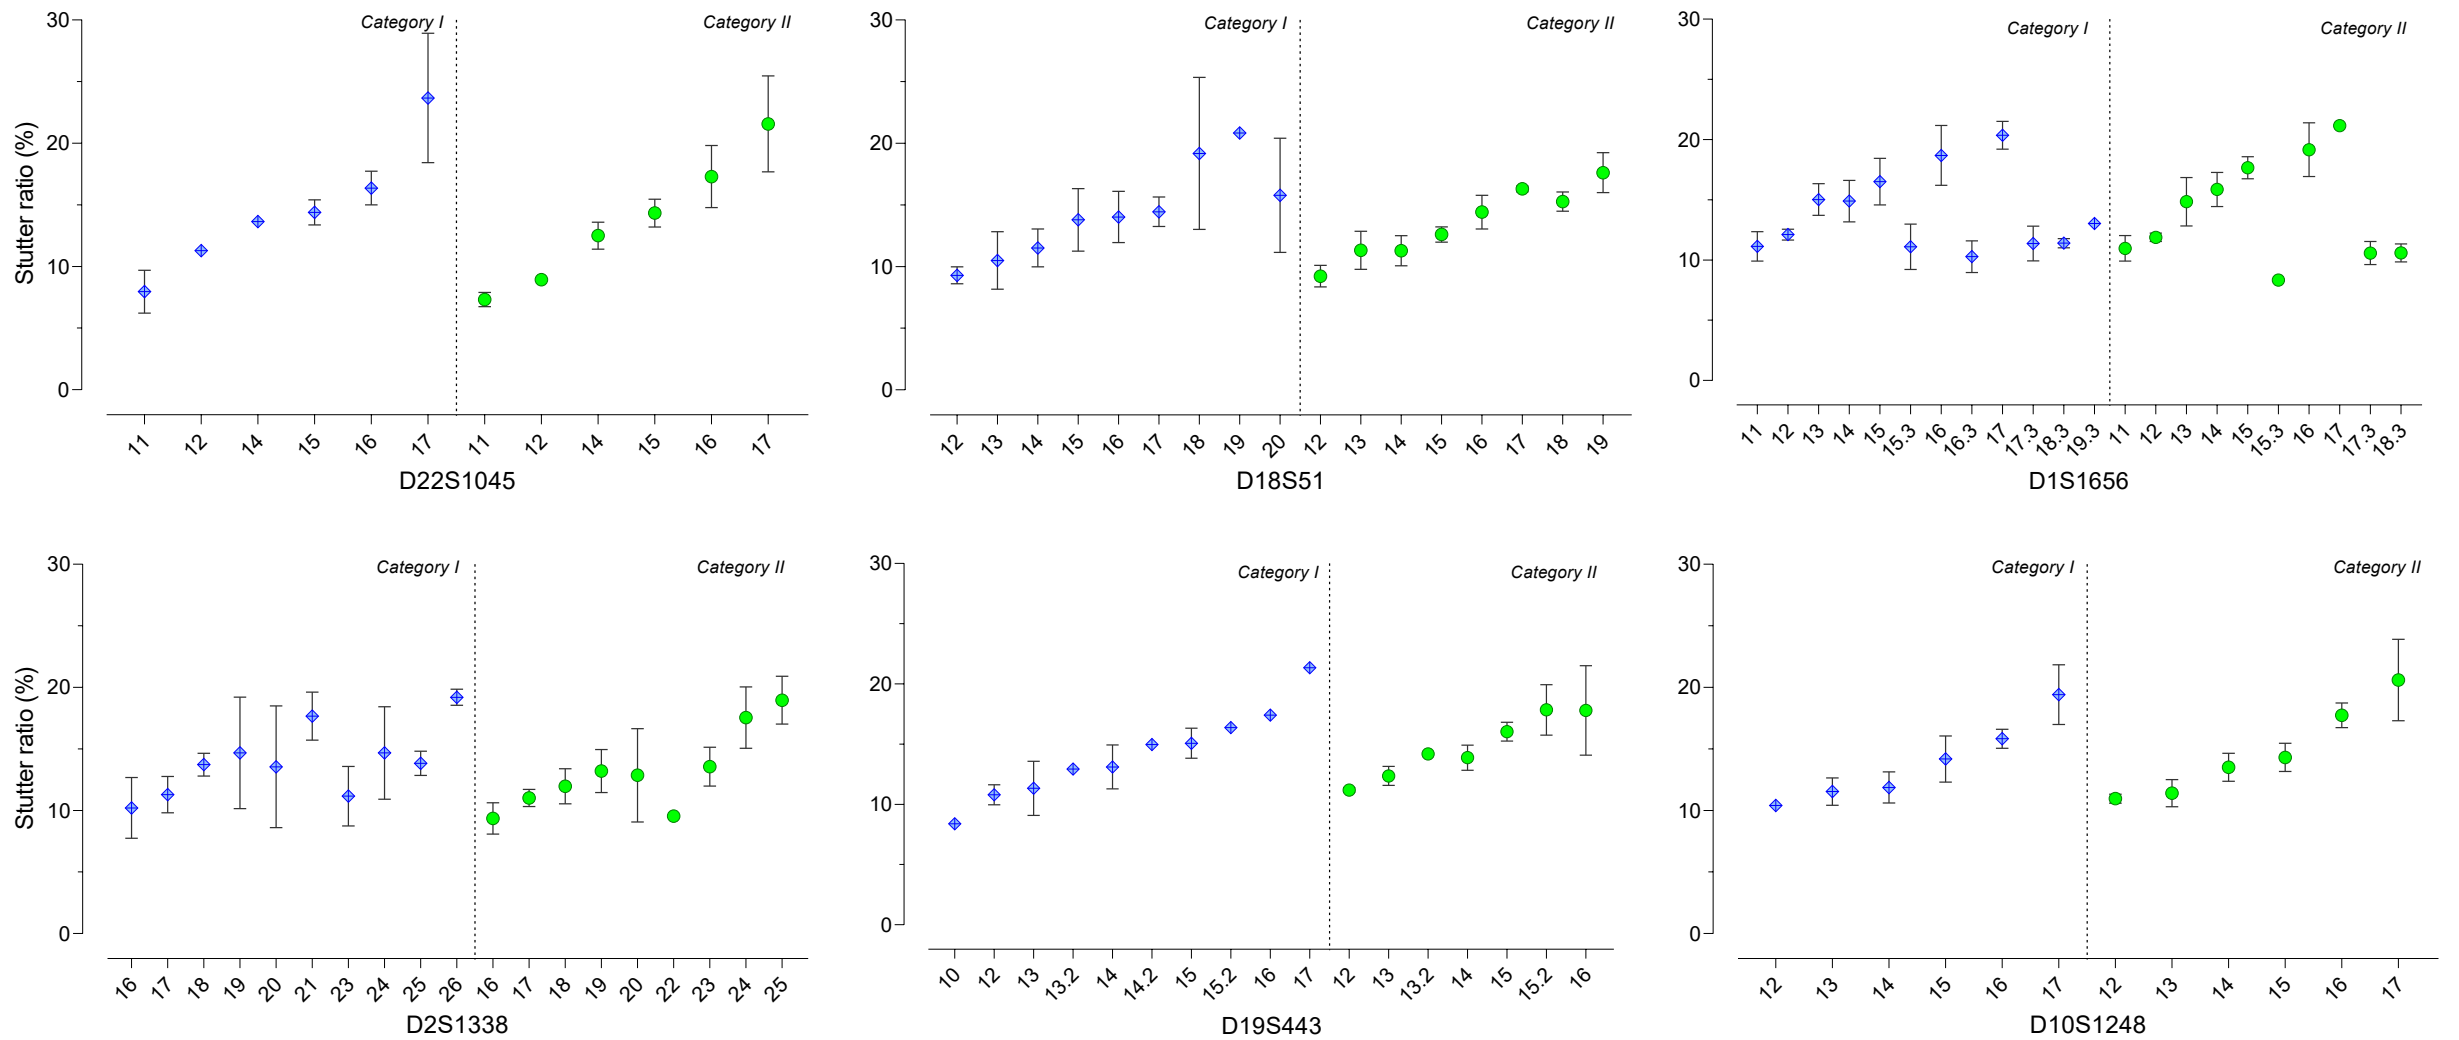

**Fig. S5** Stutter analysis was performed on a subset of 50 samples that were selected according to the total number of reads (selection criteria: category I (blue rhombuses):  $\leq 63,500$  reads; category II (green circles):  $\geq 199,000$  reads). Mean stutter ratios in percent are shown for all STR markers (error bars denote stutter ranges). The x-axis of all figures relate to marker specific alleles, e.g. “D22S1045 alleles”. Allele calls without symbol indicate alleles without detectable stutter products.

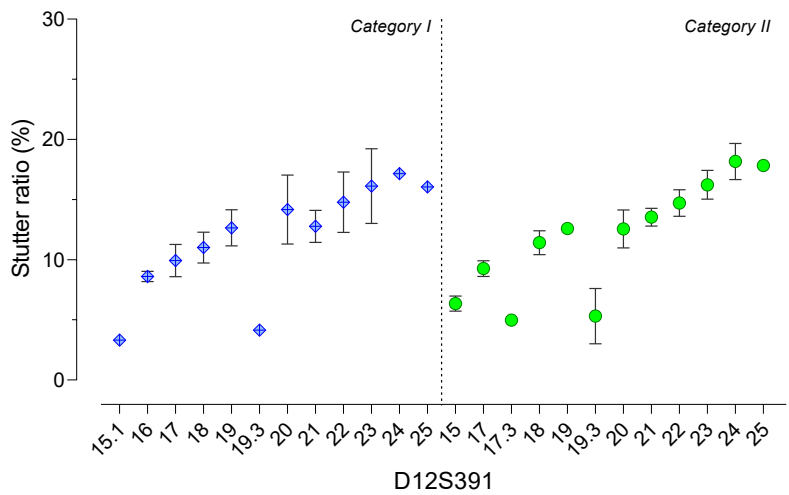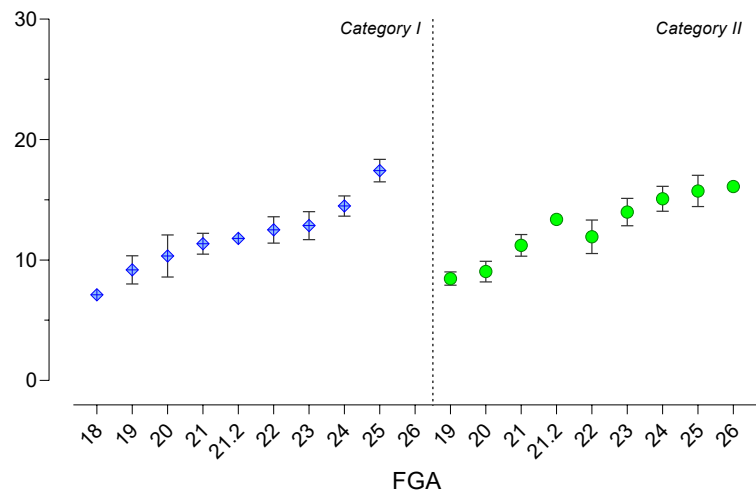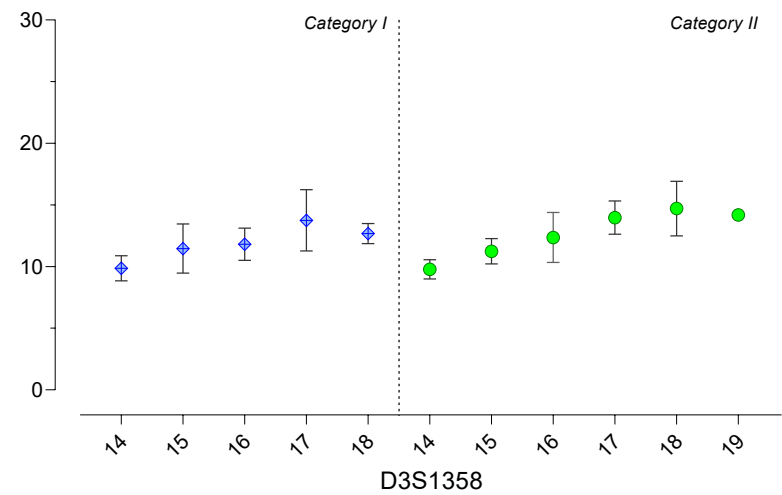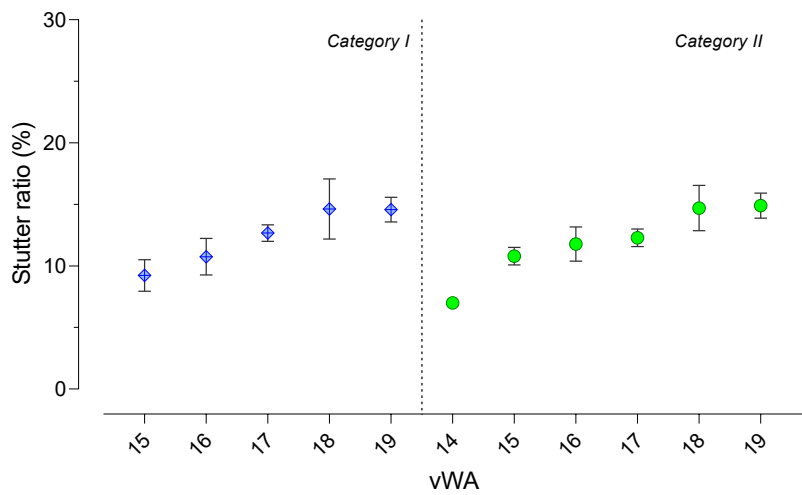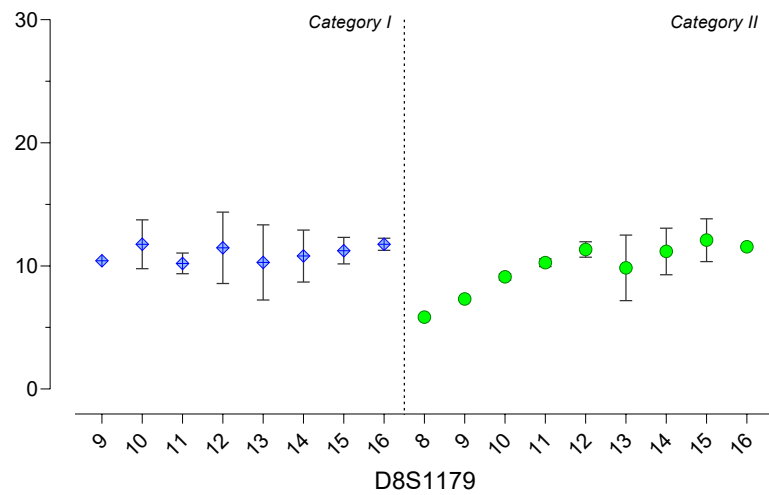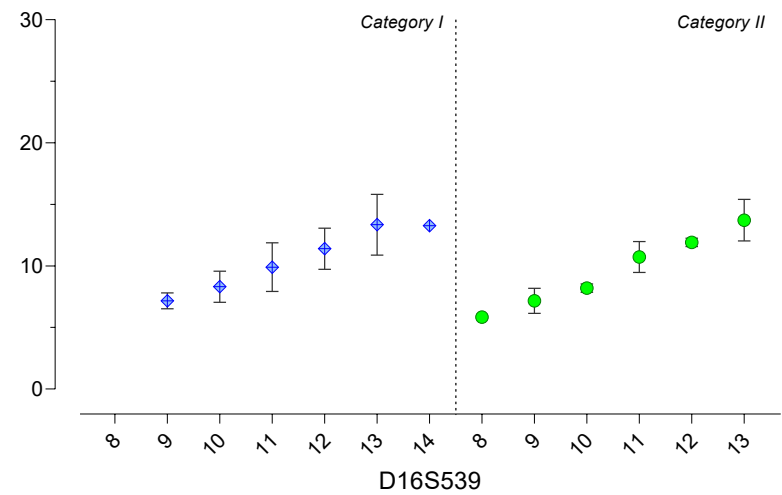

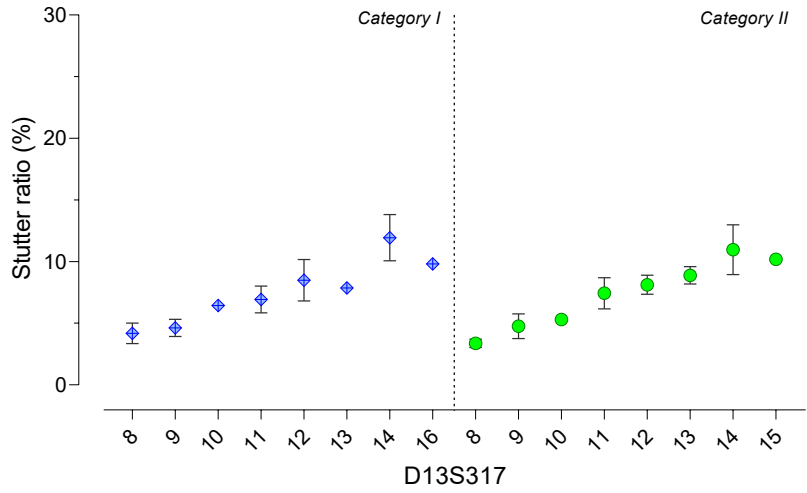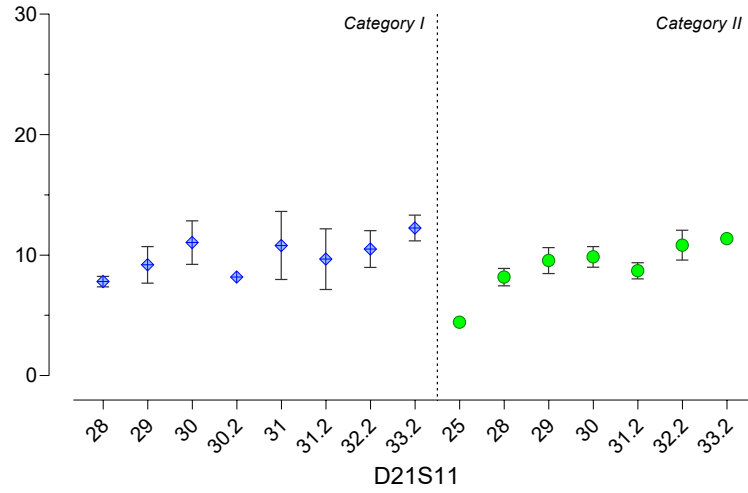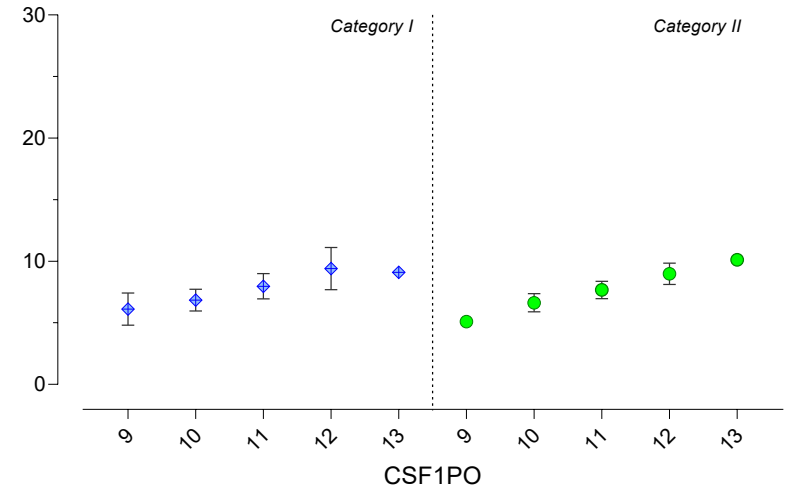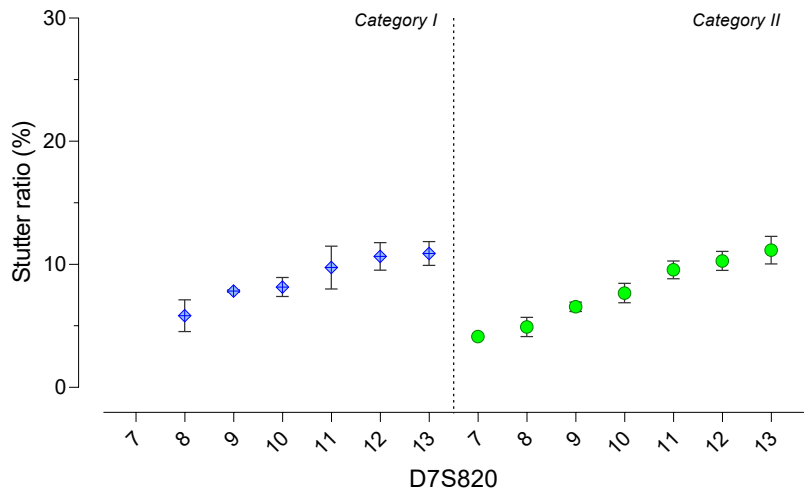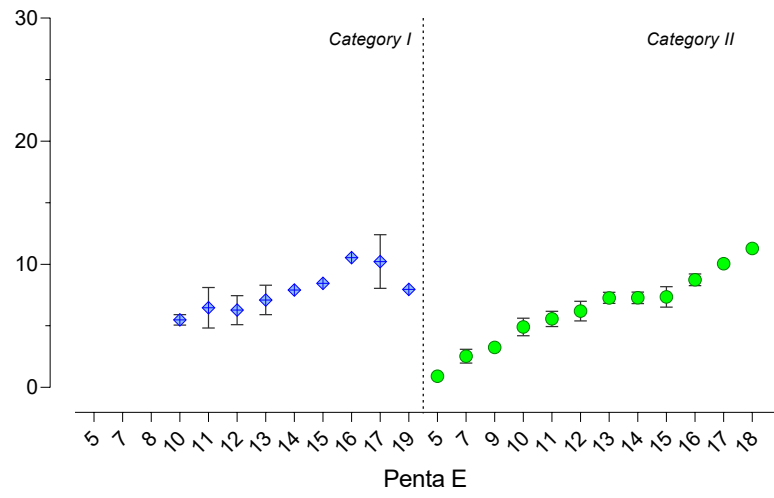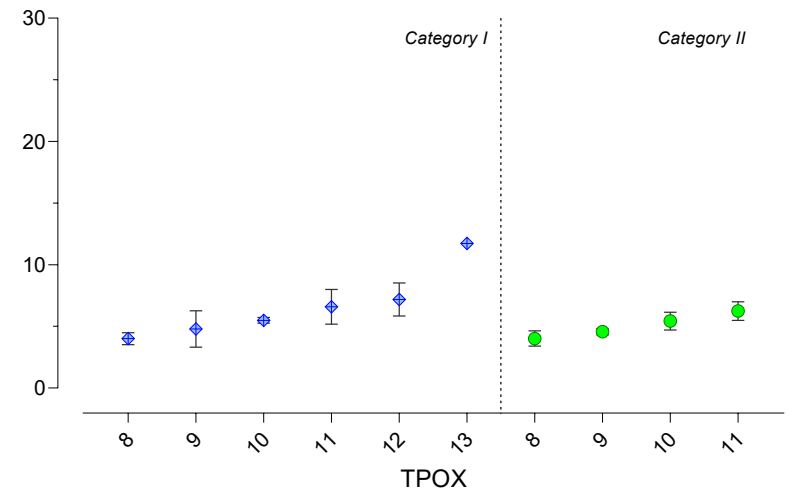

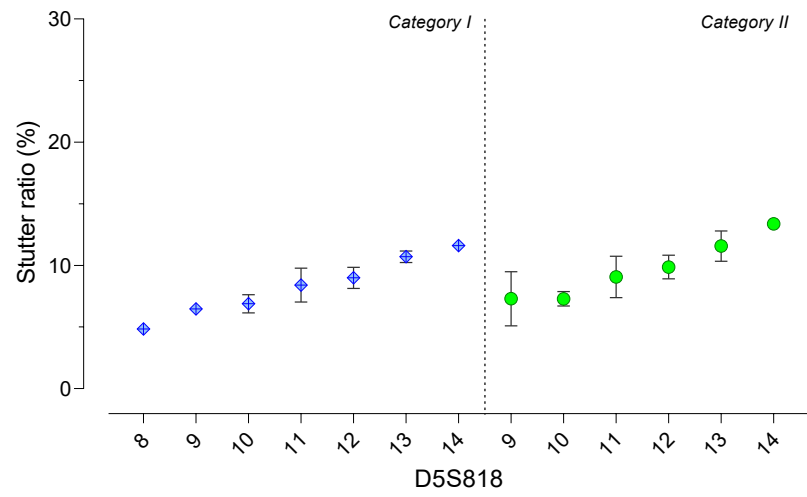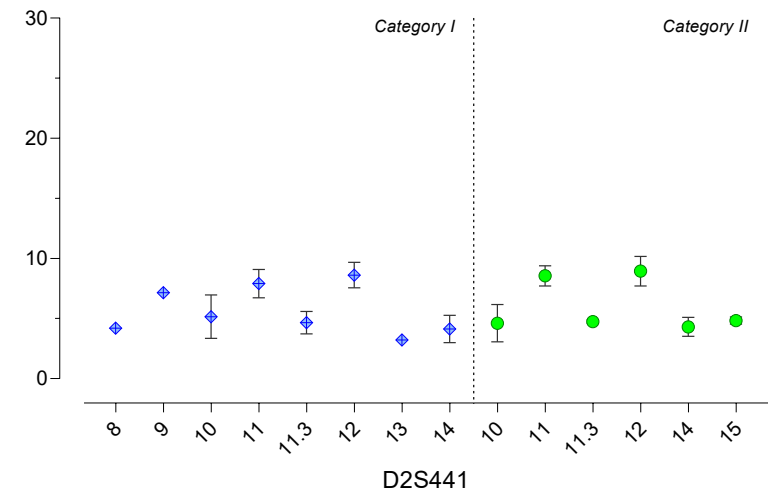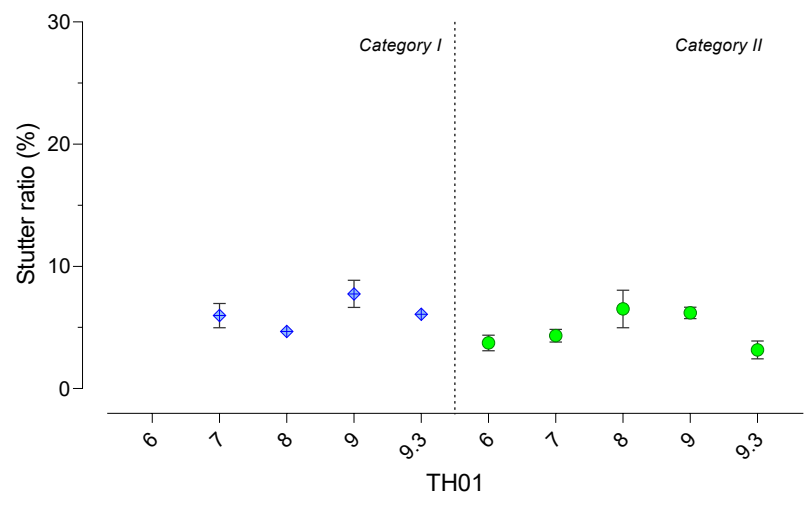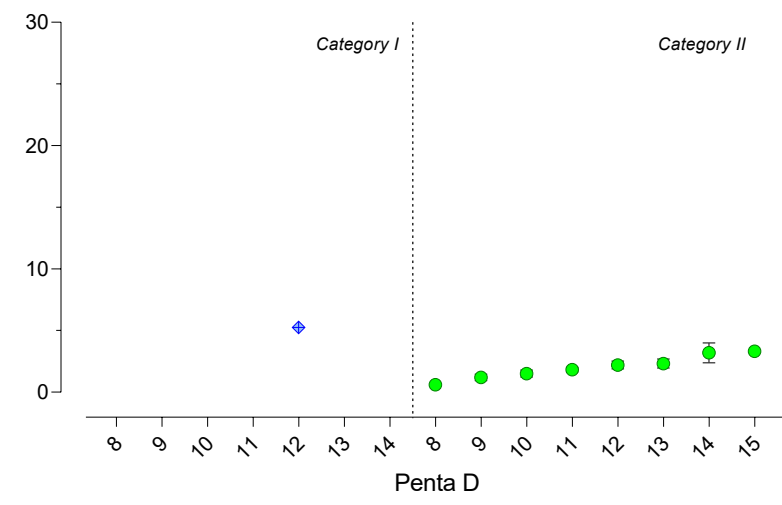

Supplement: MOESM5 [file 19601772]
