# Supplementary material for: Exploring STR sequencing for forensic DNA intelligence databasing using the Austrian National DNA Database as an example
Source: Springer Nature journal article supplement (doi:10.1007/s00414-021-02685-x), 2021-08-26
Supplement: MOESM1 [file 19601772]

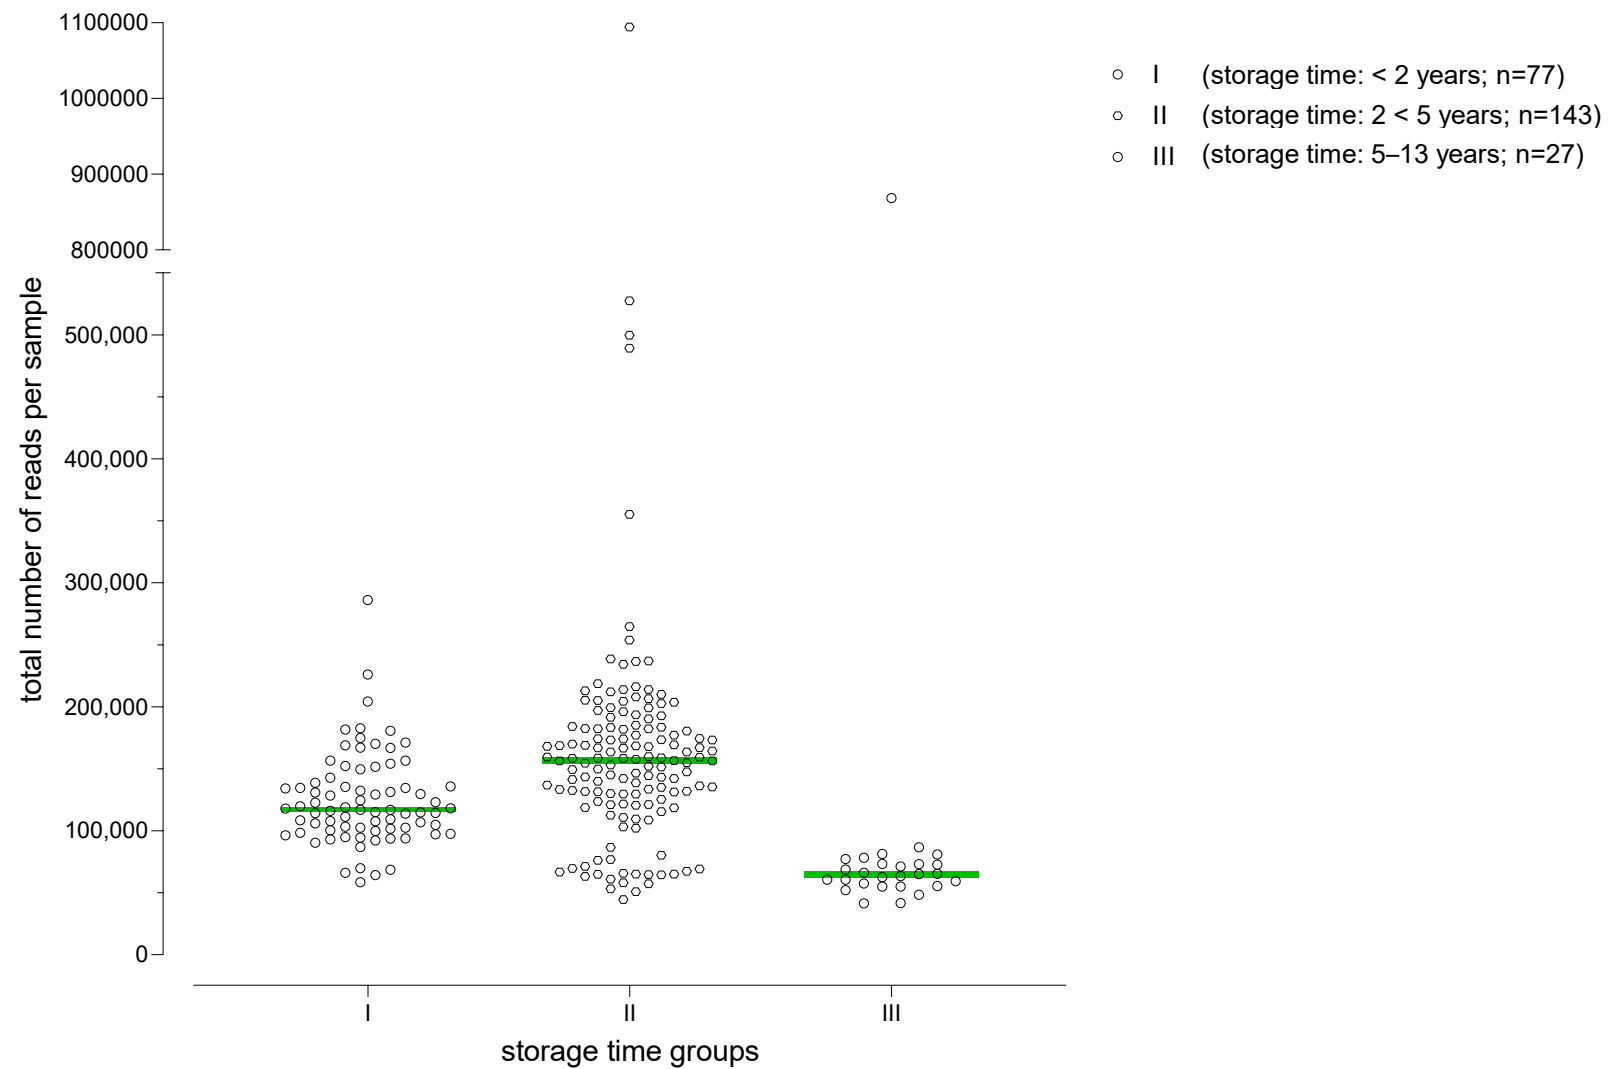

**Fig. S1** Sample performance obtained for three storage time groups (green line at median). The absolute sample performance (each sample is represented as circle) was plotted against storage time prior to MPS analysis. In general, the total number of reads per sample was comparable for the majority of specimens included in each storage time group. Overall, sample performance was almost halved for samples falling in storage time group III (median: 65092 reads) compared to those included in group I (median: 116903 reads). The decrease in sample performance did not adversely affect downstream data analysis.
