# Supplementary material for: Exploring STR sequencing for forensic DNA intelligence databasing using the Austrian National DNA Database as an example
Source: Springer Nature journal article supplement (doi:10.1007/s00414-021-02685-x), 2021-08-26
Supplement: MOESM3 [file 19601772]

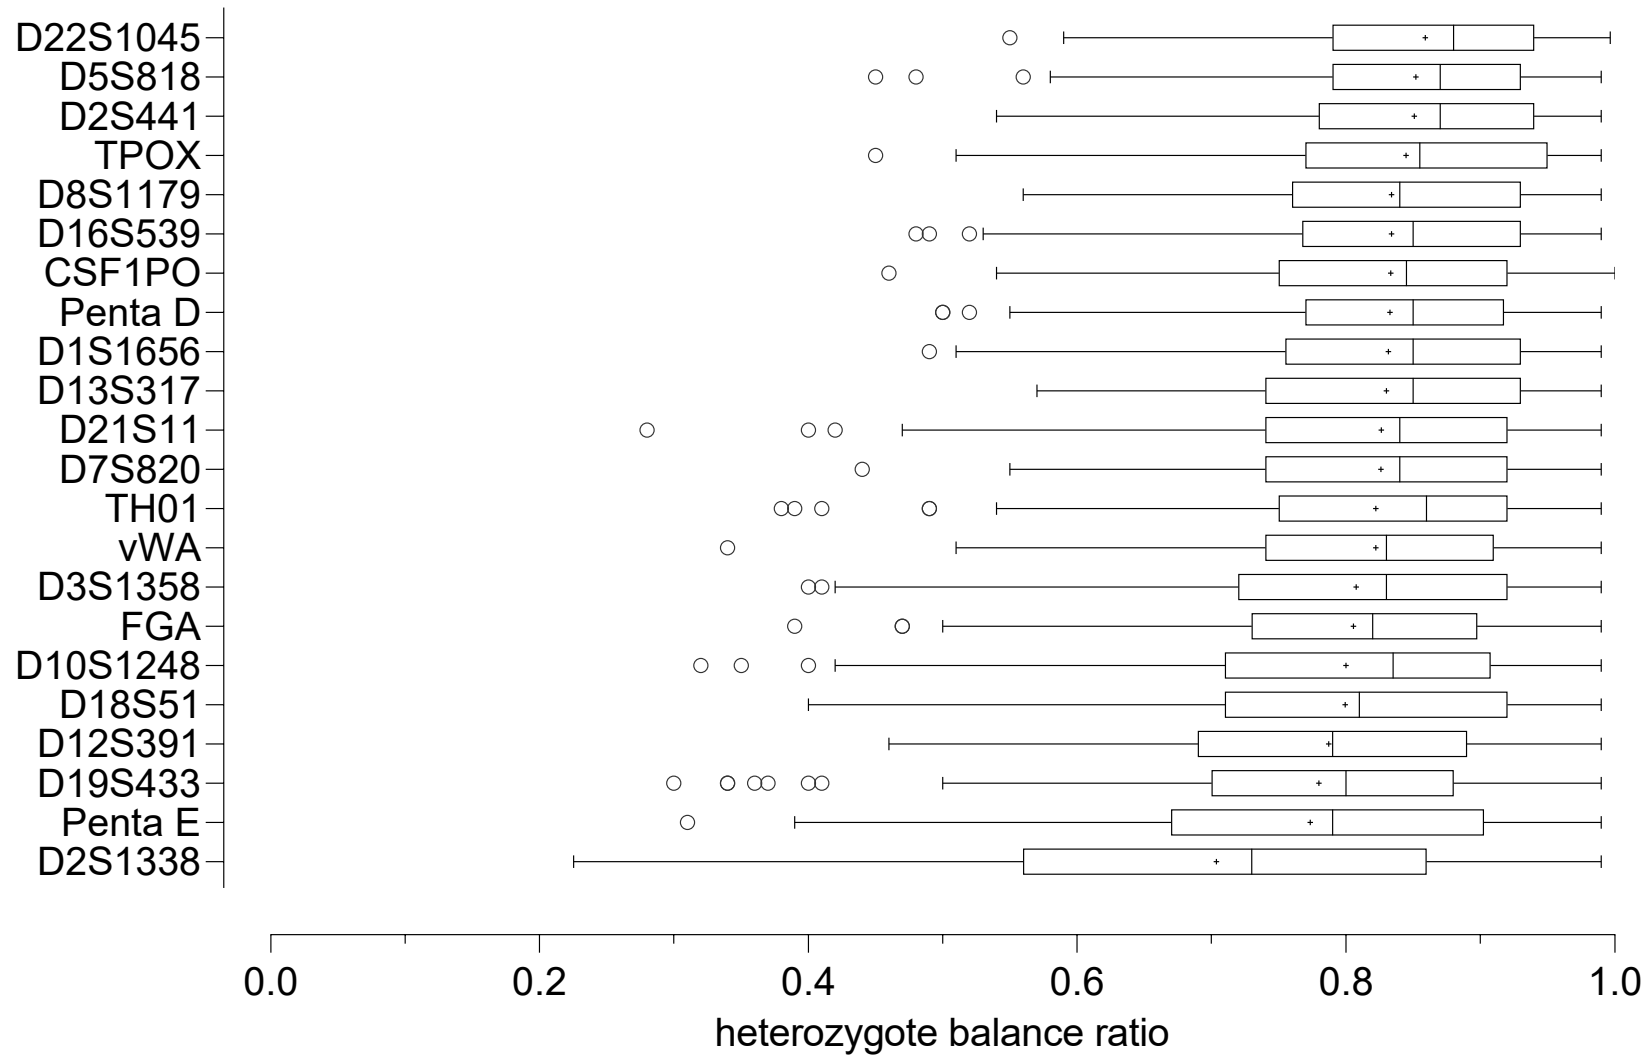

**Fig. S3** Box-whisker plot showing heterozygote balance (HB) ratios for 22 autosomal STRs. All STR markers showed average HB ratios  $\geq 0.80$  (mean shown as '+'), except D2S1338, Penta E, D19S433 and D12S391.
